# Supplementary material
Source: HighWire-hosted journal article supplement (https://www.cmaj.ca/highwire/filestream/78213/field_highwire_adjunct_files/1/200934-res-2-at.pdf)
Supplement: 200934-res-2-at.pdf [file 200934-res-2-at.pdf]

1 **APPENDIX 2 (as submitted by the authors): Supplementary tables**

2

3 **Supplementary Table 1. Life table for the cohort.**

| Years    | Number at risk | TKR | Censored | Annual Incidence (%) | Cumulative Incidence (%) | Cumulative Incidence 95% CI |       |
|----------|----------------|-----|----------|----------------------|--------------------------|-----------------------------|-------|
|          |                |     |          |                      |                          | Lower                       | Upper |
| 0 to 1   | 643            | 0   | 15       | 0.0                  | 0.0                      | -                           | -     |
| 1 to 2   | 628            | 2   | 47       | 0.3                  | 0.3                      | 0.0                         | 1.3   |
| 2 to 3   | 579            | 4   | 54       | 0.8                  | 1.1                      | 0.5                         | 2.3   |
| 3 to 4   | 521            | 9   | 40       | 1.7                  | 2.8                      | 1.7                         | 4.7   |
| 4 to 5   | 472            | 10  | 39       | 2.2                  | 5.0                      | 3.4                         | 7.3   |
| 5 to 6   | 423            | 5   | 59       | 1.2                  | 6.2                      | 4.4                         | 8.8   |
| 6 to 7   | 359            | 10  | 44       | 2.8                  | 9.0                      | 6.6                         | 12.1  |
| 7 to 8   | 305            | 12  | 48       | 3.9                  | 12.9                     | 9.9                         | 16.7  |
| 8 to 9   | 245            | 14  | 27       | 5.2                  | 18.1                     | 14.4                        | 22.7  |
| 9 to 10  | 204            | 6   | 31       | 2.6                  | 20.7                     | 16.6                        | 25.7  |
| 10 to 11 | 167            | 5   | 43       | 2.8                  | 23.5                     | 19.0                        | 28.9  |
| 11 to 12 | 119            | 8   | 20       | 5.6                  | 29.1                     | 23.6                        | 35.5  |
| 12 to 13 | 91             | 7   | 25       | 6.3                  | 35.4                     | 28.9                        | 42.9  |
| 13 to 14 | 59             | 7   | 15       | 8.8                  | 44.2                     | 36.1                        | 53.2  |
| 14 to 15 | 37             | 2   | 22       | 4.3                  | 48.5                     | 39.3                        | 58.6  |
| 15 to 16 | 13             | 1   | 7        | 5.4                  | 53.9                     | 41.3                        | 67.5  |
| 16 to 17 | 5              | 1   | 4        | 15.4                 | 69.3                     | 43.7                        | 91.2  |

4 *Abbreviations:* CI = confidence intervals; TKR = total knee replacement

5

6

7

8

9

10

11

12

13

14

15

16

17

18

19

20

21

22

23

24 **Supplementary Table 2. Life table divided by radiographic disease severity (i.e. Kellgren &**  
 25 **Lawrence grade).**  
 26

| Years                                     | Number at risk | TKR | Censored | Annual Incidence (%) | Cumulative Incidence (%) | Cumulative Incidence 95% CI |       |
|-------------------------------------------|----------------|-----|----------|----------------------|--------------------------|-----------------------------|-------|
|                                           |                |     |          |                      |                          | Lower                       | Upper |
| Mild-to-moderate (i.e. KL 2 or below)     |                |     |          |                      |                          |                             |       |
| 0 to 1                                    | 260            | 0   | 8        | 0.0                  | 0.0                      | -                           | -     |
| 1 to 2                                    | 252            | 0   | 19       | 0.0                  | 0.0                      | -                           | -     |
| 2 to 3                                    | 233            | 1   | 29       | 0.5                  | 0.5                      | 0.1                         | 3.2   |
| 3 to 4                                    | 203            | 0   | 20       | 0.0                  | 0.5                      | 0.1                         | 3.2   |
| 4 to 5                                    | 183            | 2   | 19       | 1.1                  | 1.6                      | 0.5                         | 5.0   |
| 5 to 6                                    | 162            | 0   | 33       | 0.0                  | 1.6                      | 0.5                         | 5.0   |
| 6 to 7                                    | 129            | 1   | 19       | 0.8                  | 2.4                      | 0.9                         | 6.5   |
| 7 to 8                                    | 109            | 5   | 24       | 5.1                  | 7.5                      | 3.9                         | 14.2  |
| 8 to 9                                    | 80             | 3   | 11       | 3.7                  | 11.2                     | 6.4                         | 19.3  |
| 9 to 10                                   | 66             | 1   | 14       | 1.5                  | 12.7                     | 7.4                         | 21.4  |
| 10 to 11                                  | 51             | 1   | 19       | 2.1                  | 14.8                     | 8.7                         | 24.7  |
| 11 to 12                                  | 31             | 2   | 6        | 6.1                  | 20.9                     | 12.2                        | 34.4  |
| 12 to 13                                  | 23             | 0   | 8        | 0.0                  | 20.9                     | 12.2                        | 34.4  |
| 13 to 14                                  | 15             | 0   | 4        | 0.0                  | 20.9                     | 12.2                        | 34.4  |
| 14 to 15                                  | 11             | 0   | 9        | 0.0                  | 20.9                     | 12.2                        | 34.4  |
| 15 to 16                                  | 2              | 0   | 1        | 0.0                  | 20.9                     | 12.2                        | 34.4  |
| 16 to 17                                  | 1              | 0   | 1        | 0.0                  | 20.9                     | 12.2                        | 34.4  |
| Moderate-to-severe (i.e. KL grade 3 or 4) |                |     |          |                      |                          |                             |       |
| 0 to 1                                    | 383            | 0   | 7        | 0.0                  | 0.0                      | -                           | -     |
| 1 to 2                                    | 376            | 2   | 28       | 0.6                  | 0.6                      | 0.1                         | 2.2   |
| 2 to 3                                    | 346            | 3   | 25       | 0.9                  | 1.5                      | 0.6                         | 3.4   |
| 3 to 4                                    | 318            | 9   | 20       | 2.8                  | 4.3                      | 2.6                         | 7.2   |
| 4 to 5                                    | 289            | 8   | 20       | 2.8                  | 7.1                      | 4.7                         | 10.6  |
| 5 to 6                                    | 261            | 5   | 26       | 1.8                  | 8.9                      | 6.2                         | 12.8  |
| 6 to 7                                    | 230            | 9   | 25       | 3.8                  | 12.7                     | 9.3                         | 17.3  |
| 7 to 8                                    | 196            | 7   | 24       | 3.3                  | 16.0                     | 12.1                        | 21.1  |
| 8 to 9                                    | 165            | 11  | 16       | 5.9                  | 21.9                     | 17.1                        | 27.8  |
| 9 to 10                                   | 138            | 5   | 17       | 3.0                  | 24.9                     | 19.7                        | 31.3  |
| 10 to 11                                  | 116            | 4   | 24       | 2.9                  | 27.8                     | 22.2                        | 34.6  |
| 11 to 12                                  | 88             | 6   | 14       | 5.4                  | 33.2                     | 26.7                        | 40.8  |
| 12 to 13                                  | 68             | 7   | 17       | 7.8                  | 41.0                     | 33.3                        | 49.8  |
| 13 to 14                                  | 44             | 7   | 11       | 10.8                 | 51.8                     | 42.3                        | 61.9  |
| 14 to 15                                  | 26             | 2   | 13       | 4.9                  | 56.7                     | 46.1                        | 67.8  |
| 15 to 16                                  | 11             | 1   | 6        | 5.4                  | 62.1                     | 48.7                        | 75.7  |
| 16 to 17                                  | 4              | 1   | 3        | 15.2                 | 77.3                     | 51.2                        | 95.3  |

27 *Abbreviations:* CI = confidence intervals; TKR = total knee replacement

28

29

30 **Supplementary Table 3. Life table divided by sex.**

| Years         | Number at risk | TKR | Censored | Annual Incidence (%) | Cumulative Incidence (%) | Cumulative Incidence 95% CI |       |
|---------------|----------------|-----|----------|----------------------|--------------------------|-----------------------------|-------|
|               |                |     |          |                      |                          | Lower                       | Upper |
| <b>Male</b>   |                |     |          |                      |                          |                             |       |
| 0 to 1        | 498            | 0   | 12       | 0.0                  | 0.0                      | -                           | -     |
| 1 to 2        | 486            | 0   | 39       | 0.0                  | 0.0                      | -                           | -     |
| 2 to 3        | 447            | 4   | 46       | 0.9                  | 0.9                      | 0.4                         | 2.5   |
| 3 to 4        | 397            | 5   | 32       | 1.3                  | 2.2                      | 1.2                         | 4.3   |
| 4 to 5        | 360            | 8   | 24       | 2.3                  | 4.5                      | 2.8                         | 7.2   |
| 5 to 6        | 328            | 3   | 46       | 0.9                  | 5.4                      | 3.5                         | 8.3   |
| 6 to 7        | 279            | 7   | 38       | 2.6                  | 8.0                      | 5.5                         | 11.5  |
| 7 to 8        | 234            | 9   | 34       | 3.8                  | 11.8                     | 8.6                         | 16.1  |
| 8 to 9        | 191            | 9   | 20       | 4.4                  | 16.2                     | 12.2                        | 21.3  |
| 9 to 10       | 162            | 2   | 25       | 1.1                  | 17.3                     | 13.1                        | 22.6  |
| 10 to 11      | 135            | 5   | 35       | 3.5                  | 20.8                     | 16.0                        | 26.9  |
| 11 to 12      | 95             | 6   | 17       | 5.5                  | 26.3                     | 20.4                        | 33.6  |
| 12 to 13      | 72             | 6   | 20       | 7.2                  | 33.5                     | 26.1                        | 42.2  |
| 13 to 14      | 46             | 6   | 12       | 9.9                  | 43.4                     | 34.1                        | 54.1  |
| 14 to 15      | 28             | 1   | 17       | 2.9                  | 46.3                     | 36.1                        | 57.9  |
| 15 to 16      | 10             | 0   | 6        | 0.0                  | 46.3                     | 36.1                        | 57.9  |
| 16 to 17      | 4              | 1   | 3        | 21.5                 | 67.8                     | 36.6                        | 94.0  |
| <b>Female</b> |                |     |          |                      |                          |                             |       |
| 0 to 1        | 145            | 0   | 3        | 0.0                  | 0.0                      | -                           | -     |
| 1 to 2        | 142            | 2   | 8        | 1.4                  | 1.4                      | 0.4                         | 5.7   |
| 2 to 3        | 132            | 0   | 8        | 0.0                  | 1.4                      | 0.4                         | 5.7   |
| 3 to 4        | 124            | 4   | 8        | 3.3                  | 4.7                      | 2.2                         | 10.3  |
| 4 to 5        | 112            | 2   | 15       | 1.9                  | 6.6                      | 3.3                         | 12.7  |
| 5 to 6        | 95             | 2   | 13       | 2.1                  | 8.7                      | 4.7                         | 15.6  |
| 6 to 7        | 80             | 3   | 6        | 3.5                  | 12.2                     | 7.2                         | 20.3  |
| 7 to 8        | 71             | 3   | 14       | 4.1                  | 16.3                     | 10.2                        | 25.7  |
| 8 to 9        | 54             | 5   | 7        | 8.3                  | 24.6                     | 16.4                        | 36.0  |
| 9 to 10       | 42             | 4   | 6        | 7.8                  | 32.4                     | 22.5                        | 45.1  |
| 10 to 11      | 32             | 0   | 8        | 0.0                  | 32.4                     | 22.5                        | 45.1  |
| 11 to 12      | 24             | 2   | 3        | 5.9                  | 38.3                     | 26.9                        | 52.7  |
| 12 to 13      | 19             | 1   | 5        | 3.8                  | 42.1                     | 29.5                        | 57.4  |
| 13 to 14      | 13             | 1   | 3        | 5.0                  | 47.1                     | 32.8                        | 64.1  |
| 14 to 15      | 9              | 1   | 5        | 8.2                  | 55.3                     | 37.0                        | 75.4  |
| 15 to 16      | 3              | 1   | 1        | 17.9                 | 73.2                     | 43.3                        | 95.3  |
| 16 to 17      | 1              | 0   | 1        | 0.0                  | 73.2                     | 43.3                        | 95.3  |

Abbreviations: CI = confidence intervals; TKR = total knee replacement

31  
32  
33  
34  
35

36 **Supplementary Table 4. Sensitivity Analysis. Cox regression hazard ratio estimates for**  
 37 **independent predictors of conversion from HTO to TKR when including only a single limb**  
 38 **from each patient (n=556).**

| Predictor                                                 | Hazard Ratio (95% CIs) |
|-----------------------------------------------------------|------------------------|
| Radiographic severity (Kellgren & Lawrence [KL] grade)    |                        |
| Mild-to-moderate*                                         | Reference              |
| Moderate-to-severe*                                       | 2.47 (1.26 to 4.84)    |
| Pre-operative alignment (Mechanical axis angle [degrees]) | 1.05 (0.97 to 1.14)    |
| Correction Size (mm)                                      | 1.03 (0.93 to 1.14)    |
| KOOS Pain Score (per 10 points) <sup>a</sup>              | 0.77 (0.68 to 0.89)    |
| Sex                                                       |                        |
| Male                                                      | Reference              |
| Female                                                    | 1.60 (0.98 to 2.61)    |
| Age (per 10 years)                                        | 1.40 (1.04 to 1.88)    |
| Body mass index (per 5 kg/m <sup>2</sup> )                | 1.26 (1.04 to 1.52)    |
| Year of surgery                                           | 1.01 (0.92 to 1.11)    |

39 \* Mild-to-moderate = KL grade 2 or less, moderate-to-severe = KL grade 3 or 4

40 <sup>a</sup> KOOS = Knee injury and Osteoarthritis Outcome Score – 0 indicates extreme knee symptoms; 100 indicates no  
 41 knee symptoms.

42 *Abbreviations:* CI = confidence intervals

43  
44  
45  
46  
47  
48  
49  
50  
51  
52  
53  
54  
55  
56  
57  
58  
59  
60  
61  
62  
63  
64  
65  
66  
67  
68  
69  
70  
71

72 **Supplementary Table 5. Post hoc Analysis. Cox regression hazard ratio estimates for**  
 73 **independent predictors of conversion from HTO to TKR (n=643) stratified by surgeon.**

| Predictor                                                 | Hazard Ratio (95% CIs) |
|-----------------------------------------------------------|------------------------|
| Radiographic severity (Kellgren & Lawrence [KL] grade)    |                        |
| Mild-to-moderate*                                         | Reference              |
| Moderate-to-severe*                                       | 2.07 (1.19 to 3.62)    |
| Pre-operative alignment (Mechanical axis angle [degrees]) | 1.05 (0.98 to 1.11)    |
| Correction Size (mm)                                      | 1.04 (0.96 to 1.13)    |
| KOOS Pain Score (per 10 points) <sup>a</sup>              | 0.86 (0.75 to 0.97)    |
| Sex                                                       |                        |
| Male                                                      | Reference              |
| Female                                                    | 1.66 (1.06 to 2.60)    |
| Age (per 10 years)                                        | 1.44 (1.12 to 1.85)    |
| Body mass index (per 5 kg/m <sup>2</sup> )                | 1.34 (1.14 to 1.58)    |
| Year of surgery                                           | 1.07 (0.97 to 1.18)    |

74 The model was stratified by surgeon and the variance was adjusted for staged bilateral osteotomies using robust  
 75 sandwich estimators.

76 \* Mild-to-moderate = KL grade 2 or less, moderate-to-severe = KL grade 3 or 4

77 <sup>a</sup>KOOS = Knee injury and Osteoarthritis Outcome Score – 0 indicates extreme knee symptoms; 100 indicates no  
 78 knee symptoms.

79 *Abbreviations:* CI = confidence intervals

80  
81  
82  
83  
84  
85  
86  
87  
88  
89  
90  
91  
92  
93  
94  
95  
96  
97  
98  
99  
100  
101  
102  
103

104 **Supplementary Table 6. Post hoc Analysis. Cumulative incidence of conversion from HTO**  
 105 **to TKR in patients categorized by size of surgical correction angle.**  
 106

| <b>Postoperative Alignment*<br/>(Mechanical Axis Angle)</b> | <b>Number of<br/>knees</b> | <b>5-year<br/>Cumulative incidence</b> | <b>10-year<br/>Cumulative incidence</b> |
|-------------------------------------------------------------|----------------------------|----------------------------------------|-----------------------------------------|
| 0° to 3° valgus (i.e. neutral)                              | 319                        | 1.9 (0.8 to 4.6)                       | 13.9 (9.3 to 20.5)                      |
| < 0° varus                                                  | 205                        | 9.2 (5.6 to 15.1)                      | 30.0 (22.1 to 40.0)                     |
| > 3° valgus                                                 | 119                        | 6.3 (2.9 to 13.6)                      | 23.0 (14.0 to 36.4)                     |

107 \* Values are presented as percentages (with 95% confidence intervals)  
 108 Correction angle was assessed using the first postoperative full-limb standing radiographs and the mechanical axis  
 109 angle. We defined correction angle by 3 categories based on previous literature<sup>1,2</sup>.  
 110 *Abbreviations:* CI = confidence intervals  
 111  
 112  
 113  
 114  
 115  
 116  
 117  
 118  
 119  
 120  
 121  
 122  
 123  
 124  
 125  
 126  
 127  
 128  
 129  
 130  
 131  
 132  
 133  
 134  
 135  
 136  
 137  
 138  
 139  
 140  
 141  
 142

143 **Supplementary Table 7. Post hoc Analysis. Cox regression hazard ratio estimates for**  
 144 **independent predictors of conversion from HTO to TKR (n=643) that includes correction**  
 145 **angle.**

| Predictor                                                 | Hazard Ratio (95% CIs) |
|-----------------------------------------------------------|------------------------|
| Radiographic severity (Kellgren & Lawrence [KL] grade)    |                        |
| Mild-to-moderate*                                         | Reference              |
| Moderate-to-severe*                                       | 2.07 (1.17 to 3.64)    |
| Pre-operative alignment (Mechanical axis angle [degrees]) | 1.05 (0.99 to 1.11)    |
| Correction angle (degrees) <sup>a</sup>                   |                        |
| 0° to 3° valgus (i.e. neutral)                            | Reference              |
| < 0° varus                                                | 1.87 (1.18 to 3.00)    |
| > 3° valgus                                               | 1.40 (0.80 to 2.46)    |
| KOOS Pain Score (per 10 points) <sup>b</sup>              | 0.87 (0.77 to 0.98)    |
| Sex                                                       |                        |
| Male                                                      | Reference              |
| Female                                                    | 1.68 (1.07 to 2.62)    |
| Age (per 10 years)                                        | 1.59 (1.25 to 2.03)    |
| Body mass index (per 5 kg/m <sup>2</sup> )                | 1.30 (1.11 to 1.53)    |
| Year of surgery                                           | 1.04 (0.95 to 1.13)    |

146 The variance was adjusted for staged bilateral osteotomies using robust sandwich estimators.

147 The predictor for correction size was substituted for correction angle as the variables are multicollinear.

148 \* Mild-to-moderate = KL grade 2 or less, moderate-to-severe = KL grade 3 or 4

149 <sup>a</sup> Correction angle was assessed using the first postoperative full-limb standing radiographs and the mechanical axis  
 150 angle. We defined correction angle by 3 categories based on previous literature<sup>1,2</sup>.

151 <sup>b</sup> KOOS = Knee injury and Osteoarthritis Outcome Score – 0 indicates extreme knee symptoms; 100 indicates no  
 152 knee symptoms.

153 *Abbreviations:* CI = confidence intervals

154

155

156

157

158

159

## 160 **References**

161

162 1. Fowler PJ, Tan JL, Brown GA. Medial Opening Wedge High Tibial Osteotomy: How I

163 Do It. *Operative Techniques in Sports Medicine*. 2012;20(1):87-92.

164 2. Hui C, Thompson SR, Giffin JR. Chapter 103 - Knee Arthritis. In: Miller MD, Thompson

165 SR, editors. *DeLee & Drez's Orthopaedic Sports Medicine Textbook*,. 4th ed. New York, NY:

166 Elsevier; 2014. p. 1227-42.

167

168
